# Supplementary material for: A risk prediction model for oral frailty in elderly patients with COPD was constructed based on the health ecology model
Source: Research Square preprint supplement (doi:10.21203/rs.3.rs-7400728/v1), 2025-09-11
Supplement: Supplementary file 1 [file 55cc6fae40be6bd02d907403.docx]

**TableS1:**Comparison of baseline characteristics between the training dataset and validation dataset

| Variables | Total (n = 323) | test (n = 97) | train (n = 226) | Statistic | *P* |
| --- | --- | --- | --- | --- | --- |
|
| MNA -SF sum, M (Q₁, Q₃) | 3.00 (2.00, 4.00) | 2.00 (2.00, 4.00) | 3.00 (2.00, 4.00) | Z=-1.39 | 0.165 |
| GSEOH sum, M (Q₁, Q₃) | 62.00 (59.00, 65.00) | 62.00 (60.00, 64.00) | 62.00 (59.00, 65.00) | Z=-1.32 | 0.186 |
| FRAILsum, M (Q₁, Q₃) | 1.00 (0.00, 2.00) | 1.00 (0.00, 3.00) | 1.00 (0.00, 1.00) | Z=-1.79 | 0.073 |
| Sex, n(%) |  |  |  | χ²=0.41 | 0.520 |
| Male | 216 (67.50) | 63 (64.95) | 153 (68.61) |  |  |
| Female | 104 (32.50) | 34 (35.05) | 70 (31.39) |  |  |
| Age, n(%) |  |  |  | χ²=0.94 | 0.816 |
| 60-69 | 129 (40.31) | 38 (39.18) | 91 (40.81) |  |  |
| 70-79 | 99 (30.94) | 29 (29.90) | 70 (31.39) |  |  |
| 80-89 | 69 (21.56) | 24 (24.74) | 45 (20.18) |  |  |
| ≥90 | 23 (7.19) | 6 (6.19) | 17 (7.62) |  |  |
| Occupation, n(%) |  |  |  | χ²=3.01 | 0.556 |
| Personnel of public institutions | 60 (18.75) | 21 (21.65) | 39 (17.49) |  |  |
| Professional and technical personnel | 84 (26.25) | 22 (22.68) | 62 (27.80) |  |  |
| Enterprise employees | 93 (29.06) | 29 (29.90) | 64 (28.70) |  |  |
| Freelancer | 51 (15.94) | 18 (18.56) | 33 (14.80) |  |  |
| Farmer | 32 (10.00) | 7 (7.22) | 25 (11.21) |  |  |
| Registered permanent, n(%) |  |  |  | χ²=0.16 | 0.686 |
| City | 213 (66.56) | 63 (64.95) | 150 (67.26) |  |  |
| Rural | 107 (33.44) | 34 (35.05) | 73 (32.74) |  |  |
| Marital status, n(%) |  |  |  | χ²=3.06 | 0.217 |
| Unmarried | 32 (10.00) | 7 (7.22) | 25 (11.21) |  |  |
| Married | 237 (74.06) | 70 (72.16) | 167 (74.89) |  |  |
| Divorced | 51 (15.94) | 20 (20.62) | 31 (13.90) |  |  |
| Pension, n(%) |  |  |  | χ²=8.13 | 0.087 |
| 0 | 27 (8.44) | 12 (12.37) | 15 (6.73) |  |  |
| ＜1000 | 83 (25.94) | 31 (31.96) | 52 (23.32) |  |  |
| 1000-＜3000 | 139 (43.44) | 32 (32.99) | 107 (47.98) |  |  |
| 3000-＜5000 | 53 (16.56) | 17 (17.53) | 36 (16.14) |  |  |
| ≥5000 | 18 (5.62) | 5 (5.15) | 13 (5.83) |  |  |
| Insurance, n(%) |  |  |  | χ²=0.69 | 0.877 |
| Resident Medical Insurance | 193 (60.31) | 61 (62.89) | 132 (59.19) |  |  |
| Employee Medical Insurance | 91 (28.44) | 27 (27.84) | 64 (28.70) |  |  |
| Public expense | 21 (6.56) | 5 (5.15) | 16 (7.17) |  |  |
| Own expense | 15 (4.69) | 4 (4.12) | 11 (4.93) |  |  |
| The Course of COPD, n(%) |  |  |  | χ²=1.24 | 0.744 |
| ≤1（Year） | 99 (30.94) | 31 (31.96) | 68 (30.49) |  |  |
| 2-5 | 158 (49.38) | 48 (49.48) | 110 (49.33) |  |  |
| 6-9 | 39 (12.19) | 13 (13.40) | 26 (11.66) |  |  |
| ≥10 | 24 (7.50) | 5 (5.15) | 19 (8.52) |  |  |
| Types of chronic diseases, n(%) |  |  |  | χ²=0.14 | 0.986 |
| 1 (kind) | 102 (31.88) | 30 (30.93) | 72 (32.29) |  |  |
| 2-3 | 165 (51.56) | 51 (52.58) | 114 (51.12) |  |  |
| 4-5 | 35 (10.94) | 11 (11.34) | 24 (10.76) |  |  |
| ＞5 | 18 (5.62) | 5 (5.15) | 13 (5.83) |  |  |
| Types of oral medications, n(%) |  |  |  | χ²=2.79 | 0.425 |
| 1（Kind） | 89 (27.81) | 21 (21.65) | 68 (30.49) |  |  |
| 2-3 | 158 (49.38) | 53 (54.64) | 105 (47.09) |  |  |
| 4-5 | 49 (15.31) | 15 (15.46) | 34 (15.25) |  |  |
| ＞5 | 24 (7.50) | 8 (8.25) | 16 (7.17) |  |  |
| Degree of breathing difficulty, n(%) |  |  |  | χ²=1.34 | 0.854 |
| 0(Grade) | 39 (12.19) | 14 (14.43) | 25 (11.21) |  |  |
| 1 | 107 (33.44) | 31 (31.96) | 76 (34.08) |  |  |
| 2 | 82 (25.62) | 26 (26.80) | 56 (25.11) |  |  |
| 3 | 70 (21.88) | 21 (21.65) | 49 (21.97) |  |  |
| 4 | 22 (6.88) | 5 (5.15) | 17 (7.62) |  |  |
| Smoke, n(%) |  |  |  | χ²=3.10 | 0.078 |
| No | 129 (40.31) | 32 (32.99) | 97 (43.50) |  |  |
| Yes | 191 (59.69) | 65 (67.01) | 126 (56.50) |  |  |
| Sport, n(%) |  |  |  | χ²=0.01 | 0.911 |
| No | 213 (66.56) | 65 (67.01) | 148 (66.37) |  |  |
| Yes | 107 (33.44) | 32 (32.99) | 75 (33.63) |  |  |
| The speed of eating, n(%) |  |  |  | χ²=1.96 | 0.375 |
| Slow | 107 (33.44) | 28 (28.87) | 79 (35.43) |  |  |
| Moderate | 179 (55.94) | 56 (57.73) | 123 (55.16) |  |  |
| Fast | 34 (10.62) | 13 (13.40) | 21 (9.42) |  |  |
| Healthy diet, n(%) |  |  |  | χ²=0.58 | 0.446 |
| No | 85 (26.56) | 23 (23.71) | 62 (27.80) |  |  |
| Yes | 235 (73.44) | 74 (76.29) | 161 (72.20) |  |  |
| Oral disease, n(%) |  |  |  | χ²=0.25 | 0.617 |
| No | 102 (31.88) | 29 (29.90) | 73 (32.74) |  |  |
| Yes | 218 (68.12) | 68 (70.10) | 150 (67.26) |  |  |
| Perfect teeth, n(%) |  |  |  | χ²=0.97 | 0.325 |
| No | 188 (58.75) | 53 (54.64) | 135 (60.54) |  |  |
| Yes | 132 (41.25) | 44 (45.36) | 88 (39.46) |  |  |
| Z: Mann-Whitney test, χ²: Chi-square test M: Median, Q₁: 1st Quartile, Q₃: 3st Quartile | | | | | |
|  | | | | | |
